# Supplementary material for: Liver carcinogenesis by FOS-dependent inflammation and cholesterol dysregulation
Source: PubMed Central journal article supplement — J Exp Med. 2017 May 1;214(5):1387–409. doi: 10.1084/jem.20160935 (PMC5413325; doi:10.1084/jem.20160935), 2017-05-01
Supplement: JEM_20160935_sm.pdf [file JEM_20160935_sm.pdf]

SUPPLEMENTAL MATERIAL

Bakiri et al., <https://doi.org/10.1084/jem.20160935>

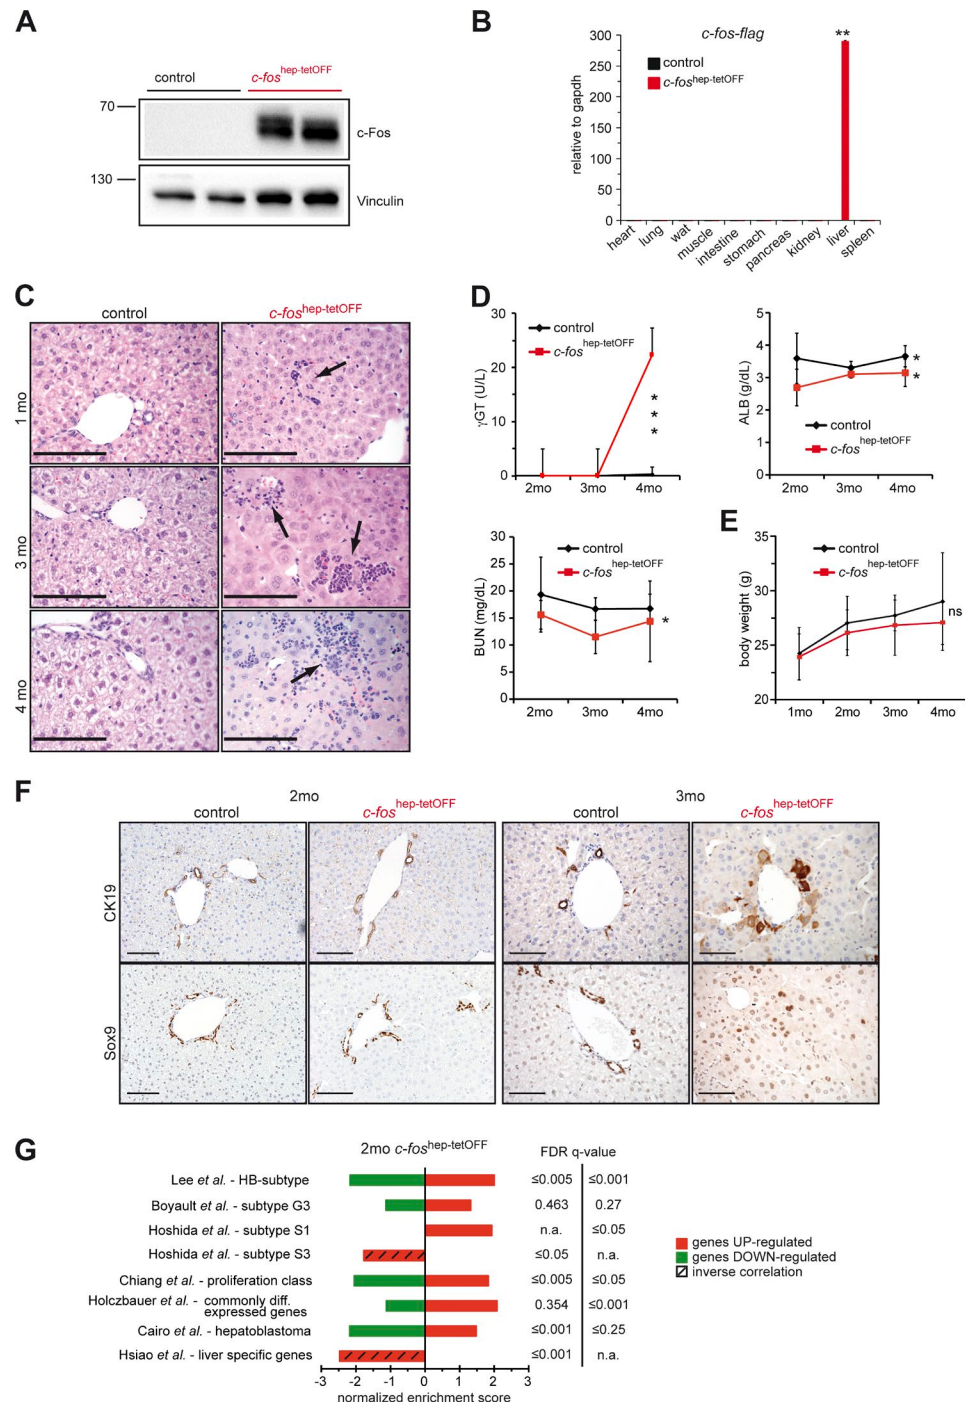

Figure S1. **Phenotypic consequences of hepatocyte-specific *c-Fos* expression.** (A) Representative *c-Fos* immunoblot in livers from *c-fos*<sup>hep-tetOFF</sup> and control mice 2 mo after doxycycline removal. Vinculin served as loading control. Molecular mass is indicated in kilodaltons. (B) qRT-PCR analyses of *c-fos-flag* in different tissues. Bar graphs represent mean  $\pm$  SD relative to gapdh;  $n = 2/3$ ; \*\*,  $P \leq 0.01$  by Student's *t* test. (C) Representative H&E in *c-fos*<sup>hep-tetOFF</sup> and control mice at the indicated time points after doxycycline removal. Bars, 100  $\mu$ m. Arrows indicate necrotic foci. (D) Serum  $\gamma$ -glutamyl transferase ( $\gamma$ GT), albumin (ALB), and blood urea nitrogen (BUN) at the indicated time points of doxycycline removal/*c-Fos* expression ( $n = 13; 3; 9/11; 3; 6$ ). (E) Body weight ( $n = 12; 14; 6; 15/10; 14; 7; 11$ ) at the indicated time points of doxycycline removal/*c-Fos* expression. Plots represent mean  $\pm$  SD; \*,  $P \leq 0.05$ ; \*\*,  $P \leq 0.01$ ; \*\*\*,  $P \leq 0.001$ ; ns, not significant by two-way ANOVA. (F) Representative IHC for CK19 and Sox9 at 2 and 3 mo of *c-Fos* expression. Bars, 100  $\mu$ m. (G) Normalized enrichment scores at 2 mo of *c-Fos* expression relative to controls (RNA-seq,  $n = 2$ /cohort) compared with human HCC molecular classes and relevant gene signatures by GSEA. False discovery rate (FDR)  $q$ -values are indicated on the right side. n.a., not applicable, as the published gene signature was uni-directional (with only enriched genes). Hatched bars highlight inverse correlations computed with up-regulated (red) or down-regulated (green) gene sets.

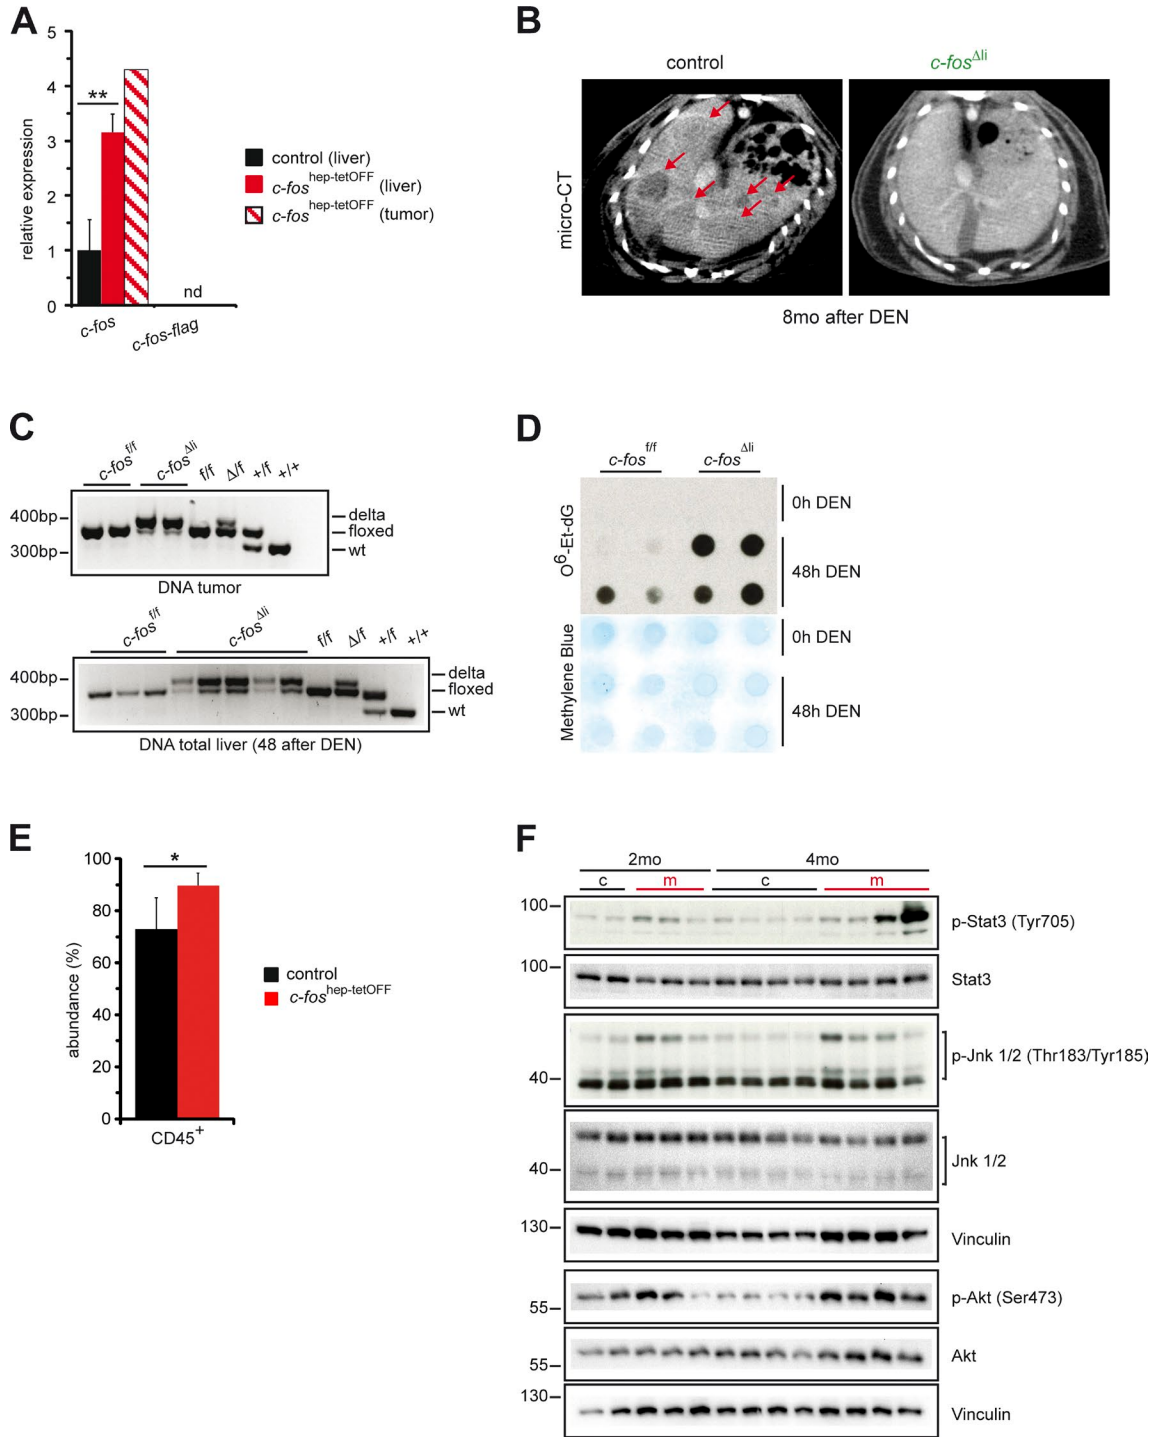

**Figure S2. c-Fos expression is essential for HCC development.** (A) qRT-PCR analyses (total *c-fos* and *c-fos-flag*) 7 mo after intraperitoneal DEN injection in mice with ectopic *c-Fos* expression between 3 and 9 wk and in control littermates. Bar graphs represent mean  $\pm$  SD;  $n = 4/3/1$ ; mean expression in controls set to 1; \*\*,  $P \leq 0.01$  by Student's *t* test. nd, not detected. (B) Representative micro-CT of one *c-fos*<sup>Δli</sup> mouse and its control littermate 8 mo after DEN injection. Arrows indicate liver tumors. (C) PCR analysis of genomic DNA from DEN-induced liver tumors (top) and total liver (bottom, 48 h after DEN injection) of *c-fos*<sup>Δli</sup> and *c-fos*<sup>f/f</sup> mice. The wild-type (wt), floxed (f), and deleted ( $\Delta$ ) alleles of *c-fos* are indicated. (D) Dot blot analysis of DEN-induced DNA adducts in liver DNA from *c-fos*<sup>Δli</sup> and control mice (without and 48 h after DEN) using an antibody against O<sup>6</sup>-ethyl-2-deoxyguanosine (O<sup>6</sup>-Et-dG). Methylene blue staining served as loading control. (E) Flow cytometry analysis of isolated nonparenchymal liver cell fraction for CD45 positivity at 2 mo of ectopic *c-Fos* expression. Bar graphs represent mean  $\pm$  SD;  $n = 6$ /cohort; \*,  $P \leq 0.05$  by Student's *t* test. (F) Western blot of total liver lysate of *c-fos*<sup>hep-tetOFF</sup> and control mice 2 and 4 mo after doxycycline removal. Vinculin served as loading control. Molecular mass is indicated in kilodaltons.

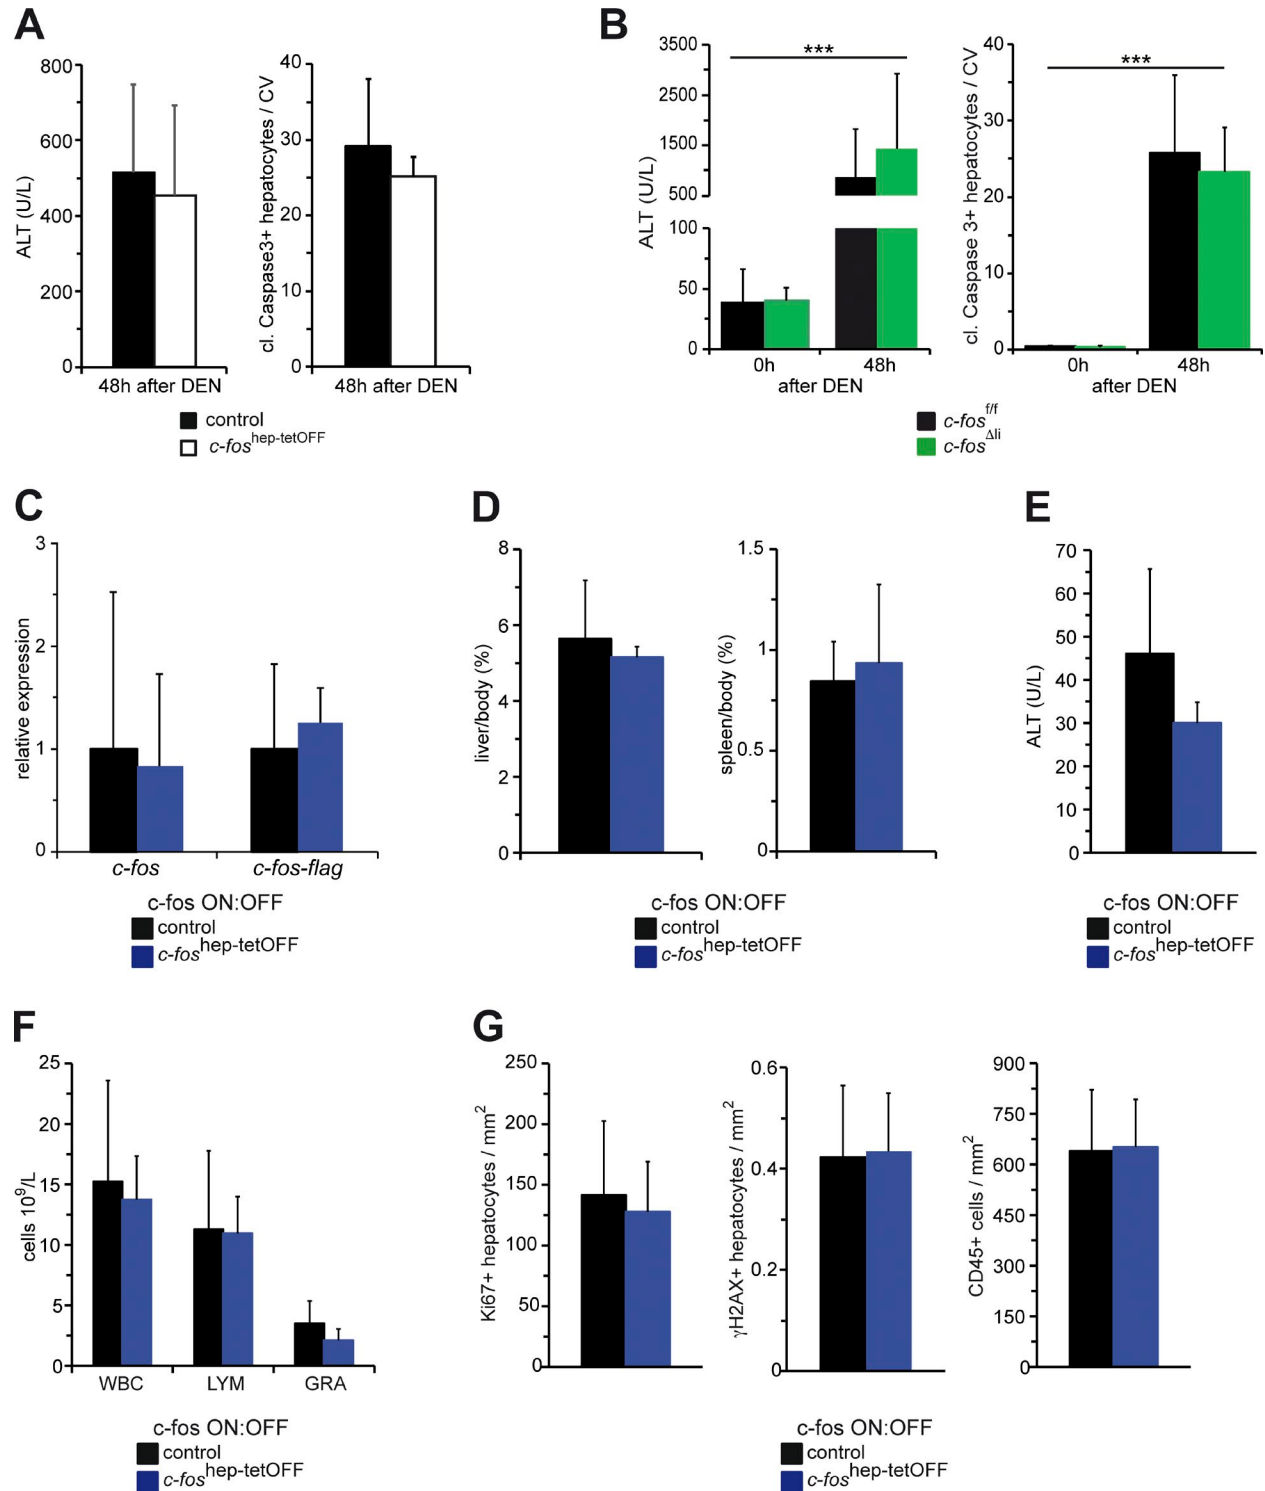

Figure S3. **DEN-induced events and c-Fos phenotype reversibility.** (A) Serum ALT ( $n = 5/5$ ) and quantification of cleaved caspase 3-positive cells around the central vein (CV;  $n = 5/5$ ) in liver sections from 8-wk-old *c-fos*<sup>hep-tetOFF</sup> and control mice 48 h after DEN. Plots represent mean  $\pm$  SD. (B) Serum ALT ( $n = 4; 3/7; 6$ ) and quantification of cleaved caspase 3-positive cells around the CV ( $n = 3; 3/22; 8$ ) in liver sections from 8-wk-old *c-fos* <sup>$\Delta$ li</sup> and control mice untreated (0) and 48 h after DEN. Plots represent mean  $\pm$  SD; \*\*\*,  $P \leq 0.001$  by Student's  $t$  test. (C–G) qRT-PCR analyses (C; total *c-fos* and *c-fos-flag*), liver/body and spleen/body ratio (D), serum ALT (E), blood cell count of white blood cells (WBC), lymphocytes (LYM), and granulocytes (GRA; F), and quantification of Ki67- and  $\gamma$ H2AX-positive hepatocytes and CD45-positive cells in liver sections (G) in *c-fos*<sup>hep-tetOFF</sup> and control mice 2 mo after the switch from Fos on to off state (4 mo Fos on/2 mo Fos off). Bar graphs represent mean  $\pm$  SD;  $n = 3/5$ .

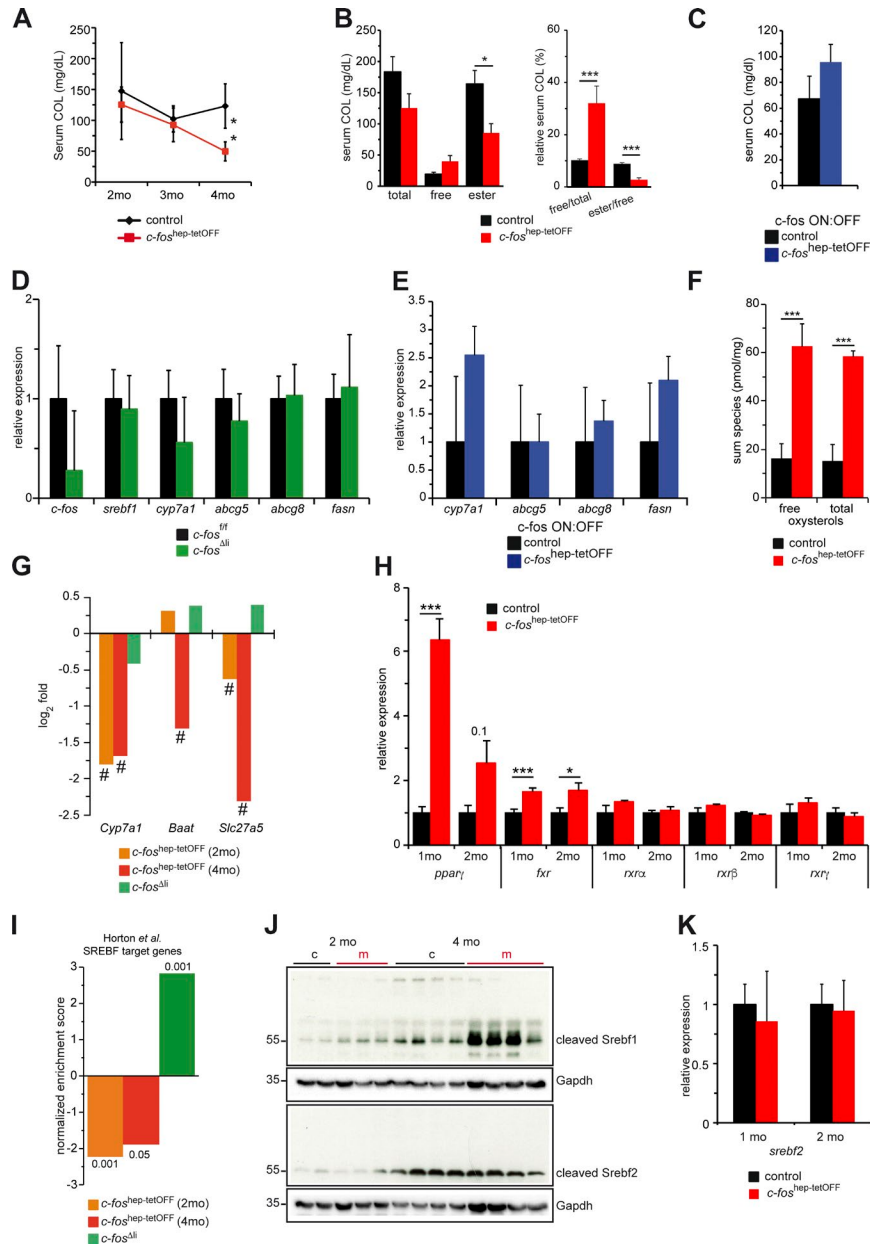

**Figure S4. Liver metabolic pathways affected by c-Fos.** (A) Serum total cholesterol (COL) at the indicated time points of c-Fos expression ( $n = 12; 5; 15/11; 7; 9$ ). Plot represents mean  $\pm$  SD; \*\*,  $P \leq 0.01$  by two-way ANOVA. (B) Serum cholesterol species at c-Fos expression ( $n = 7/9$ ). Bar graphs represent mean  $\pm$  SD; \*,  $P \leq 0.05$ ; \*\*\*,  $P \leq 0.001$  by Student's  $t$  test. (C) Serum total cholesterol (COL) in  $c\text{-fos}^{\text{hep-tetOFF}}$  and control mice 2 mo after the switch from Fos on to off state (4 mo Fos on/2 mo Fos off). Bar graph represents mean  $\pm$  SD;  $n = 3/5$ . (D and E) qRT-PCR for LXRA target genes in  $c\text{-fos}^{\Delta/\Delta}$  and control mice ( $n = 6/\text{cohort}$ ) at 48 h after DEN injection (D) and in  $c\text{-fos}^{\text{hep-tetOFF}}$  and control mice 2 mo after the switch from Fos on to off state (E). Bar graphs represent mean  $\pm$  SD;  $n = 3/5$ ; mean expression in controls set to 1. (F) Free and total oxysterol in liver extracts from  $c\text{-fos}^{\text{hep-tetOFF}}$  at 4 mo of c-Fos expression. Bar graphs represent mean  $\pm$  SD of the sum of all oxysterols species resolved by mass spectrometry ( $n = 5/\text{cohort}$ ). \*\*\*,  $P \leq 0.0005$  by Student's  $t$  test. (G) Relative expression of Cyp7a1 and BA amidation enzymes by RNA-seq in  $c\text{-fos}^{\text{hep-tetOFF}}$  at 2 and 4 mo of ectopic c-Fos expression ( $n = 2; 3/\text{cohort}$ ) and  $c\text{-fos}^{\Delta/\Delta}$  48 h after DEN ( $n = 3/\text{cohort}$ ) mice. Bar graphs represent mean fold changes ( $\log_2$ ); # indicates significance after multiple testing corrections. (H) qRT-PCR analyses of the indicated nuclear receptors, including FXR encoded by Nr1h4, in total liver tissue of  $c\text{-fos}^{\text{hep-tetOFF}}$  and control mice at 1 and 2 mo of c-Fos expression. Bar graphs represent mean  $\pm$  SD; mean expression in each control group set to 1;  $n = 5; 5/5; 5$ . \*,  $P \leq 0.05$ ; \*\*\*,  $P \leq 0.001$ . (I) Normalized enrichment scores for each indicated genotype and condition derived from GSEA of the published Horton et al. (2003) SREBF signature (RNA-seq,  $n = 2; 3; 3/\text{cohort}$ ). False discovery rate (FDR)  $q$ -values are indicated on each bar. (J) Srebf1 and Srebf2 immunoblot in liver lysates from  $c\text{-fos}^{\text{hep-tetOFF}}$  and control mice 2 and 4 mo after doxycycline removal. Gapdh served as loading control. Molecular mass is indicated in kilodaltons. (K) qRT-PCR analyses of *srebf2* in total liver tissue of  $c\text{-fos}^{\text{hep-tetOFF}}$  and control mice at 1 and 2 mo of c-Fos expression. Bar graphs represent mean  $\pm$  SD;  $n = 5/\text{cohort}$ ; mean expression in each control group set to 1.

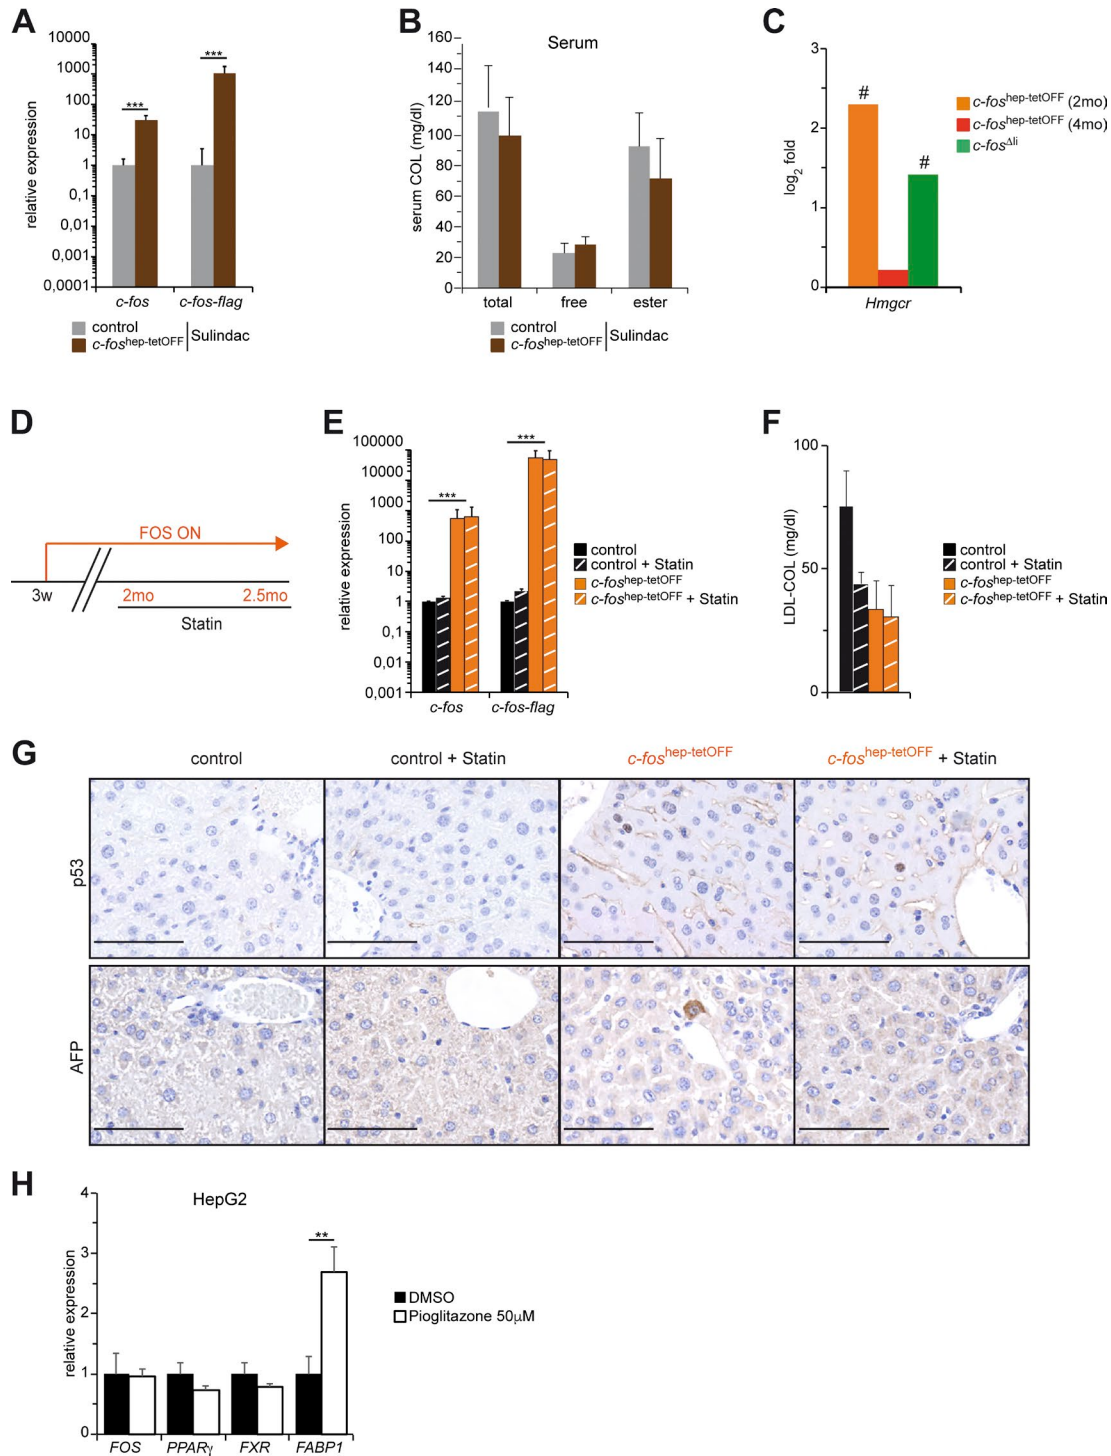

Figure S5. **Regulation of LXR $\alpha$  expression by c-Fos.** qRT-PCR analyses (A; total *c-fos* and *c-fos-flag*) and serum cholesterol species (B) in *c-fos<sup>hep-tetOFF</sup>* and control mice 2 mo after sulindac treatment. Bar graphs represent mean  $\pm$  SD;  $n = 6/6$ ; \*\*\*,  $P \leq 0.001$  by Student's  $t$  test. (C) Relative expression of *Hmgcr* by RNA-seq in *c-fos<sup>hep-tetOFF</sup>* at 2 and 4 mo of ectopic c-Fos expression ( $n = 2$ ; 3/cohort) and *c-fos<sup>Δli</sup>* 48 h after DEN ( $n = 3$ /cohort) mice. Bar graph represents mean fold changes (log<sub>2</sub>); # indicates significance after multiple testing corrections. (D) Ectopic expression of c-Fos was allowed during 2.5 mo and combined with daily statin treatment during the last 2 wk. (E and F) qRT-PCR analyses (E; total *c-fos* and *c-fos-flag*) and serum LDL cholesterol (F) in untreated and statin-treated *c-fos<sup>hep-tetOFF</sup>* and control mice. Bar graphs represent mean  $\pm$  SD;  $n = 2$ ; 2/4; 6. \*\*\*,  $P \leq 0.001$ . (G) AFP and p53 IHC in untreated and statin-treated *c-fos<sup>hep-tetOFF</sup>* and control mice. Bars, 100  $\mu$ m. (H) Relative mRNA expression of LXR $\alpha$  and its target genes in HepG2 cells 24 h after treatment with the PPAR $\gamma$  agonist pioglitazone or vehicle (DMSO). Bar graph represents mean  $\pm$  SD;  $n = 3$ ; DMSO-treated cells set to 1. \*\*,  $P \leq 0.01$  by Student's  $t$  test.

Table S1. **Full and abbreviated name of BA and oxysterol species determined by MS**

| Abbreviation            | Full name                     |
|-------------------------|-------------------------------|
| <b>Free oxysterols</b>  |                               |
| 25-OHC                  | 25-Hydroxycholesterol         |
| 24S-OHC                 | 24S-Hydroxycholesterol        |
| 24/25-EC                | 24,25-Epoxycholesterol        |
| 7b-OHC                  | 7 $\beta$ -Hydroxycholesterol |
| Desmos                  | Desmosterol                   |
| <b>Total oxysterols</b> |                               |
| 24S-OHC                 | 24S-Hydroxycholesterol        |
| 24/25-EC                | 24,25-Epoxycholesterol        |
| Desmos                  | Desmosterol                   |
| 7-DC                    | 7-Dehydrocholesterol          |
| <b>BAs</b>              |                               |
| CA                      | Cholic acid                   |
| CDCA                    | Chenodeoxycholic acid         |
| LCA                     | Lithocholic acid              |
| MCA(a)                  | $\alpha$ -Muricholic acid     |
| TDCA                    | Taurodeoxycholic acid         |
| TUDCA                   | Tauroursodeoxycholic acid     |
| UDCA                    | Ursodeoxycholic acid          |

Table S2. Specific primers used in this study

| Gene              | Forward primer (5'–3')   | Reverse primer (5'–3')  |
|-------------------|--------------------------|-------------------------|
| <b>Mouse</b>      |                          |                         |
| <i>abcg5</i>      | TTGCGATACACAGCGATGC      | ATCTAGCATCATGACCTTGGG   |
| <i>abcg8</i>      | GTCGTCTCCAAATGCACTCG     | ACGAGCAGGAAGTGTAAGG     |
| <i>acaca</i>      | CTGGCTTACAGGATGTTTGG     | GCATTTCACTGCTGCAATACC   |
| <i>acly</i>       | CTTAGCCTGTGAGCTGATGG     | TTGTACAGGAGTTCTTTGCCG   |
| <i>cyp51</i>      | ACAGGATAACCCAGCATCAGG    | GGATTACTGGGTTTTCTGGGG   |
| <i>cyp7a1</i>     | GACATGGAGAAGGCTAAGACG    | TGATGCTATCTAGTACTGGCAGG |
| <i>fasn</i>       | AGGATCTCTCCAAGTTCGACG    | GTCTCGGGATCTCTGCTAAGG   |
| <i>c-fos</i>      | CCAGTCAAGAGCATCAGCAA     | TAAGTAGTGCAGCCCGAGT     |
| <i>c-fos-flag</i> | CCAGTCAAGAGCATCAGCAA     | TGTCGTCGTCGTCCTTGATG    |
| <i>fxr</i>        | AGATGGGGATGTTGGCTGAA     | GTTCCGTTTTCTCCCTGCAA    |
| <i>gpam</i>       | CTTGACGATCTATGCAGTCC     | GCCATACTGGATGAACCTGGC   |
| <i>hmgcs1</i>     | TACAAGCCTGACATGCTCTCC    | GTCATTACAGGAACATCCGAGC  |
| <i>idl1</i>       | ACCTTTCAGGTTGTTTCACC     | CCAGATACCATCAGATTGGGC   |
| <i>krt19</i>      | ATGATCGTCTCGCCTCCTAC     | TGGTTGTAATCTCGGGAGGG    |
| <i>lxra</i>       | AGGGAGGAGTGTGTCTGTC      | GCAGGACTTGAGGAGGTGAG    |
| <i>mvd</i>        | ATACACATTTGATGCTGGCC     | GTGGCAATGATGACTGGACC    |
| <i>mylip</i>      | TAAAGAGTCCCTCTTGCCAGG    | GCTGACACAATCTGCAGAACC   |
| <i>ppara</i>      | CATCACAGACCCCTCTCTCC     | CGATCACACTTGTCTGACACC   |
| <i>pparg2</i>     | GAAGTTGGTGGCCAGAATG      | TTGACCCAGAGCATGGTGC     |
| <i>rxr-a</i>      | CATTGTTGGCGACTTTTGC      | AGTTCACCTGGGTAGAGAAG    |
| <i>rxr-b</i>      | TGACCTACTCGTGTCTGAT      | ATCTCCATCCCCGTCTTTGT    |
| <i>rxr-g</i>      | CACCCTCAGGAGCACTGG       | TGCTTCCCTGAGGATCTGTCC   |
| <i>sqle</i>       | TGTCAGAAACCAACCAAGTGC    | ACTTGAGAAAGAGTCCATCCG   |
| <i>srebf1</i>     | TTGTGGAGCTCAAAGACCTGG    | TAAGCGTCTCCACCACTTCG    |
| <i>srebf2</i>     | GGTGAGACCTACCATGCATCC    | CAGGTGTCTACCTCTCCATGC   |
| <i>thrsp</i>      | AACGACGCTGCTGAAACG       | CAGTCTTCTCTCGTGAAGCG    |
| <b>Human</b>      |                          |                         |
| <i>ABCG5</i>      | CCTCAGAAACATACAAGAAATGCC | TCTAGATGTTGCACCTGGGC    |
| <i>ABCG8</i>      | AGACGAAGGATCTTGACGAGG    | GGTCATTGACATCAGACAGGC   |
| <i>c-FOS</i>      | CGTTGTGAAGACCATGACAGG    | CCTTCTCCTTCAGCAGGTTGG   |
| <i>CYP7A1</i>     | GTGCCAATCCTCTTGAGTTCC    | GTGGTATTTCCATCCATCGGG   |
| <i>FABP2</i>      | CACCCCTTGATATCCTTCC      | TTCTCCGGCAAGTACCAACT    |
| <i>FASN</i>       | GCTGGAAGTCACCTATGAAGC    | AGTCGAAGAAGAGGAGGCC     |
| <i>FXR</i>        | TGGGAATGTTGGCTGAATGT     | TCACTTGTGCGAAGTCACGA    |
| <i>LXRa</i>       | GTTATAACCGGAAGACTTTGCCA  | GCCTCTCTACCTGGAGCTGGT   |
| <i>PPARG</i>      | CTCCTATTGACCCAGAAAGCGA   | TGCCATGAGGGAGTTGGAAG    |

## REFERENCE

Horton, J.D., N.A. Shah, J.A. Warrington, N.N. Anderson, S.W. Park, M.S. Brown, and J.L. Goldstein. 2003. Combined analysis of oligonucleotide microarray data from transgenic and knockout mice identifies direct SREBP target genes. *Proc. Natl. Acad. Sci. USA*. 100:12027–12032. <http://dx.doi.org/10.1073/pnas.1534923100>
